# Supplementary material
Source: PubMed Central journal article supplement (PMC8425665)
Supplement: ASN.2020081234SupplementaryData1.pdf [file ASN.2020081234SupplementaryData1.pdf]

## SUPPLEMENTARY MATERIALS

A rare autosomal dominant variant in regulator of calcineurin type1 (*RCAN1*) gene confers enhanced calcineurin activity and may cause FSGS

Brandon M Lane<sup>1</sup>, Susan Murray<sup>2</sup>, Katherine Benson<sup>3</sup>, Agnieszka Bierzynska<sup>4</sup>, Megan Chryst-Stangl<sup>1</sup>, Liming Wang<sup>13</sup>, Guanghong Wu<sup>1</sup>, Gianpiero Cavalleri<sup>3</sup>, Brendan Doyle<sup>5</sup>, Neil Fennelly<sup>5</sup>, Anthony Dorman<sup>5</sup>, Shane Conlon<sup>2</sup>, Virginia Vega-Warner<sup>6</sup>, Damian Fermin<sup>6</sup>, Poornima Vijayan<sup>7</sup>, Mohammad Azfar Qureshi<sup>7</sup>, Shirlee Shril<sup>8</sup>, Moumita Barua<sup>7</sup>, Friedhelm Hildebrandt<sup>8</sup>, Martin Pollak<sup>9</sup>, David Howell<sup>10</sup>, Matthew G. Sampson<sup>8,11</sup>, Moin Saleem<sup>4</sup>, Peter J Conlon<sup>2, 12</sup>, Robert Spurney<sup>13</sup>, Rasheed Gbadegesin<sup>1,13</sup>

1 Department of Pediatrics, Division of Nephrology and Duke Molecular Physiology Institute, Duke University School of Medicine, Durham, NC, USA

2 Irish Kidney Gene Project, Department of genetics, Royal College of Surgeons of Ireland, Republic of Ireland

3 School of Pharmacy and Biomolecular Sciences, Royal College of Surgeons of Ireland, Dublin, Republic of Ireland

4 Department of Pediatrics, Bristol Royal Hospital for Children and University of Bristol, Bristol BS2 8BJ, UK

5 Department of Pathology, Beaumont General Hospital, Dublin, Republic of Ireland

6 Department of Pediatrics, University of Michigan, Ann Arbor, MI, USA

7 Department of Medicine, Division of Nephrology, University of Toronto and Toronto General Hospital, Toronto, ON, Canada

8 Department of Pediatrics, Division of Nephrology, Boston Children's Hospital and Harvard University Medical School, Boston MA, USA

9 Department of Medicine, Division of Nephrology, Beth Israel Hospital and Harvard University Medical School, Boston, MA, USA

10 Department of Pathology, Duke University School of Medicine, Durham, NC, USA

11 Broad Institute of Harvard and MIT, Cambridge, MA, USA

12 Department of Medicine, Division of Nephrology, Beaumont General Hospital, Dublin, Republic of Ireland

13 Department of Medicine, Division of Nephrology, Duke University School of Medicine, Durham, NC, USA

## Supplemental Material Table of Contents

Supplementary Figure 1: Filtering of rare variants in WGS data from Family 40030

Supplementary Figure 2: Pedigree of second FSGS family with segregating *RCAN1* variant

Supplementary Figure 3: *RCAN* gene expression in cultured Human podocytes

Supplementary Figure 4: *RCAN1* and CN binding

Supplementary Figure 5: *RCAN1* single transfection calcineurin activity.

Supplementary Figure 6: Late Apoptosis/Necrosis quantification

Supplementary Figure 7: Unmodified western blots

Supplementary Table 1: Segregating heterozygous variants found in Family 40030

Supplementary Table 2: Evolutionary conservation of *RCAN1* variant residues

Supplementary Table 3: Description of patient cohorts

Supplementary Table 4: Heterozygous missense variants in *RCAN1-3* genes

Supplementary Table 5: Members of the Nephrotic Syndrome Study Network (NEPTUNE)

Supplementary Movie 1: *RCAN1* WT protein modeling

Supplementary Movie 2: *RCAN1* p.I162T protein modeling

Supplementary Movie 3: *RCAN1* WT apoptosis

Supplementary Movie 4: *RCAN1* p.I162T apoptosis

Supplementary Movie 5: *RCAN1* p.I162T apoptosis rescue with FK506

**Supplementary Figure 1:** Filtering of rare variants in WGS data from Family 40030

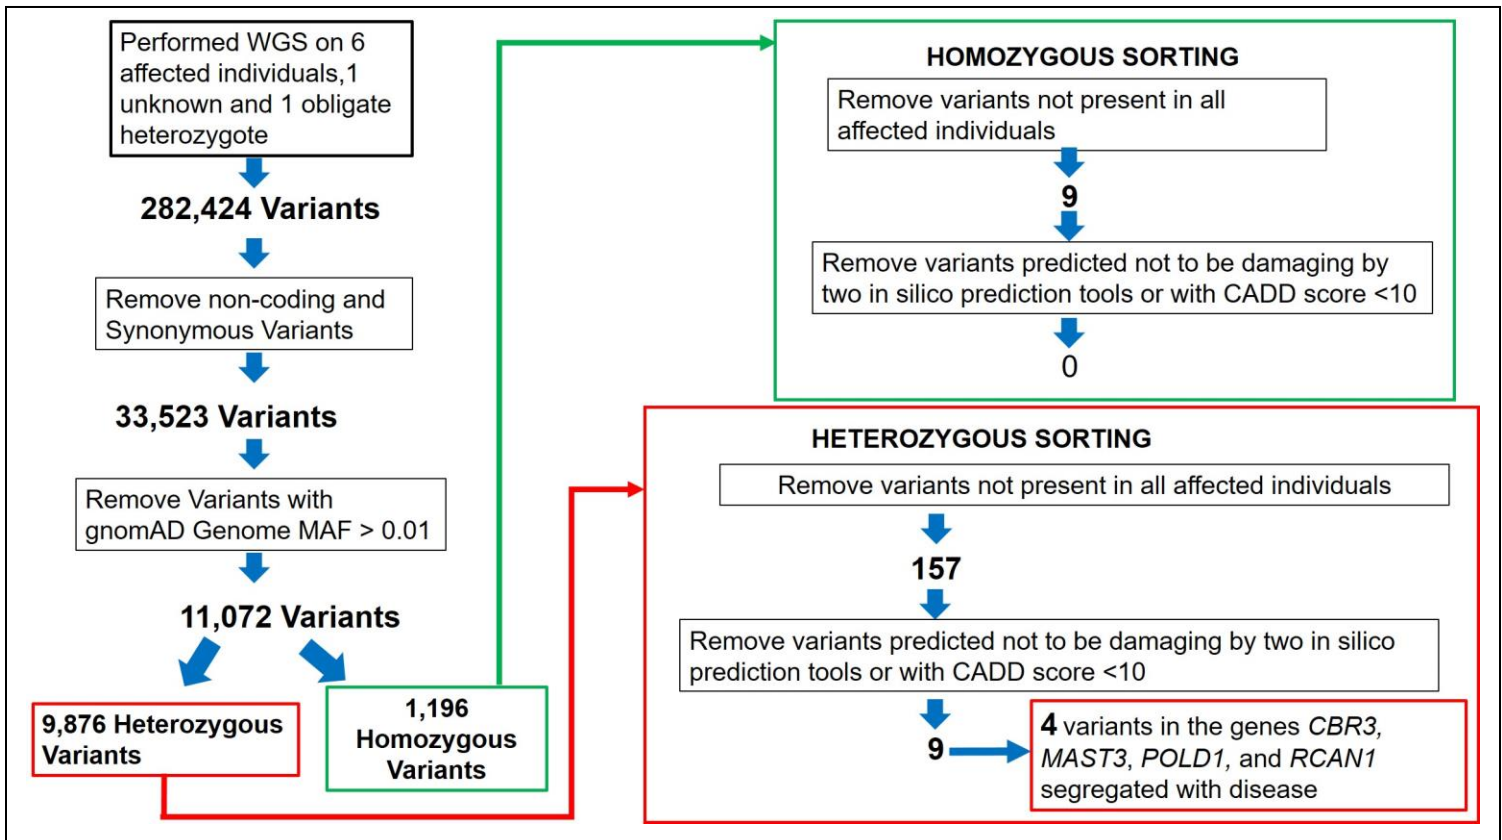

**Supplementary Figure 2:** Pedigree of second FSGS family with segregating RCAN1 variant

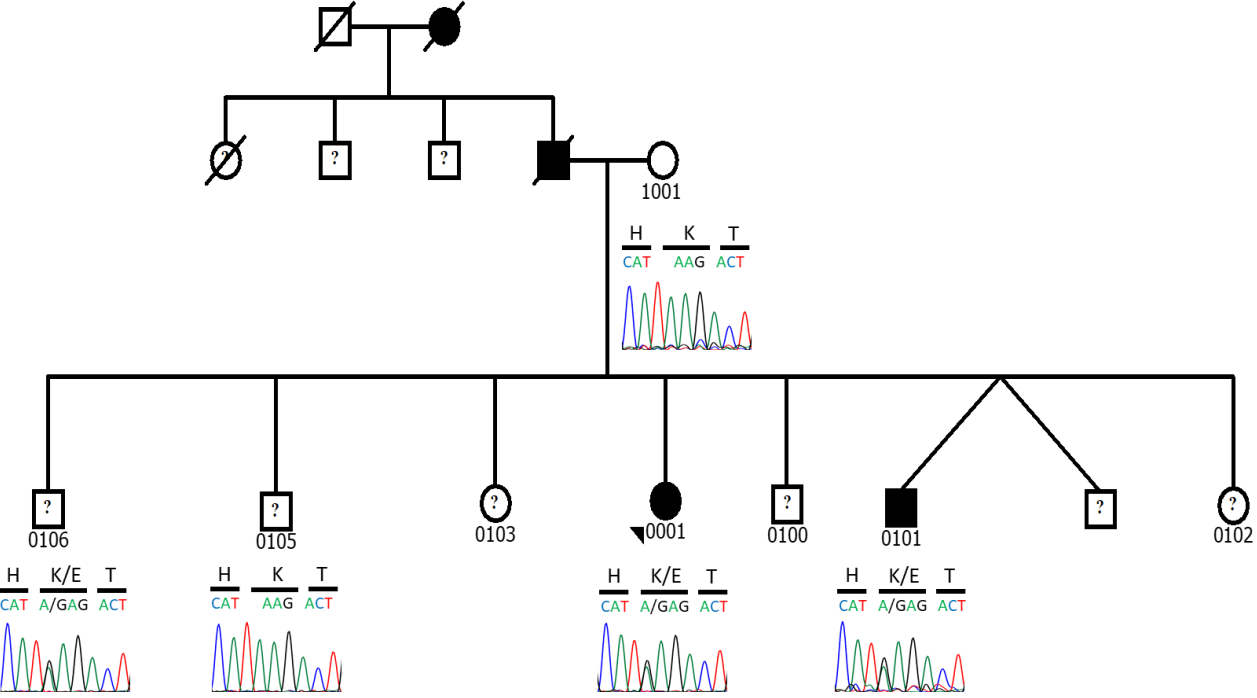

### Supplementary Figure 3: *RCAN* gene expression in cultured Human podocytes

Quantitative Real-Time PCR analysis of three independent samples of differentiated conditionally immortalized human podocytes revealed that *RCAN1*, *RCAN2*, and *RCAN3* are expressed in the podocyte. The mean Ct values for each gene are listed to provide a relative comparison of *RCAN* genes expression to known podocyte genes *CD2AP* and *PTPRO* (*GLEPP1*). These values suggest that *RCAN1-3* are expressed at a similar level to *CD2AP* and *PTPRO*. This analysis was repeated in triplicate with multiple wells per sample for each replicate.

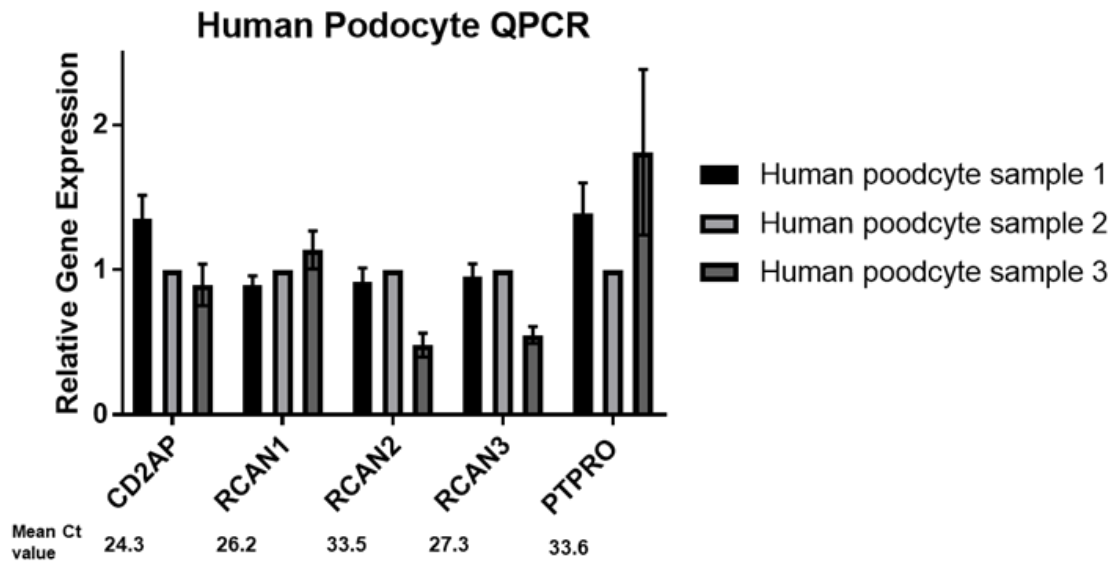

**Supplementary Figure 4: RCAN1 and CN binding**

To determine if the *RCAN1* mutations affected docking of RCAN1 and calcineurin, we transfected human embryonic kidney cells (HEK293) cells with a flag-tagged calcineurin construct and myc-tagged *RCAN1* constructs as indicated. Immunoprecipitation studies were then performed as described in the Methods Section. (a) Immunoprecipitation of the calcineurin construct co-immunoprecipitated equal amounts of wild type and mutant RCAN1 proteins. (b) Conversely, immunoprecipitation of either wild type or mutant *RCAN1* constructs co-immunoprecipitated equal amounts of the calcineurin protein.

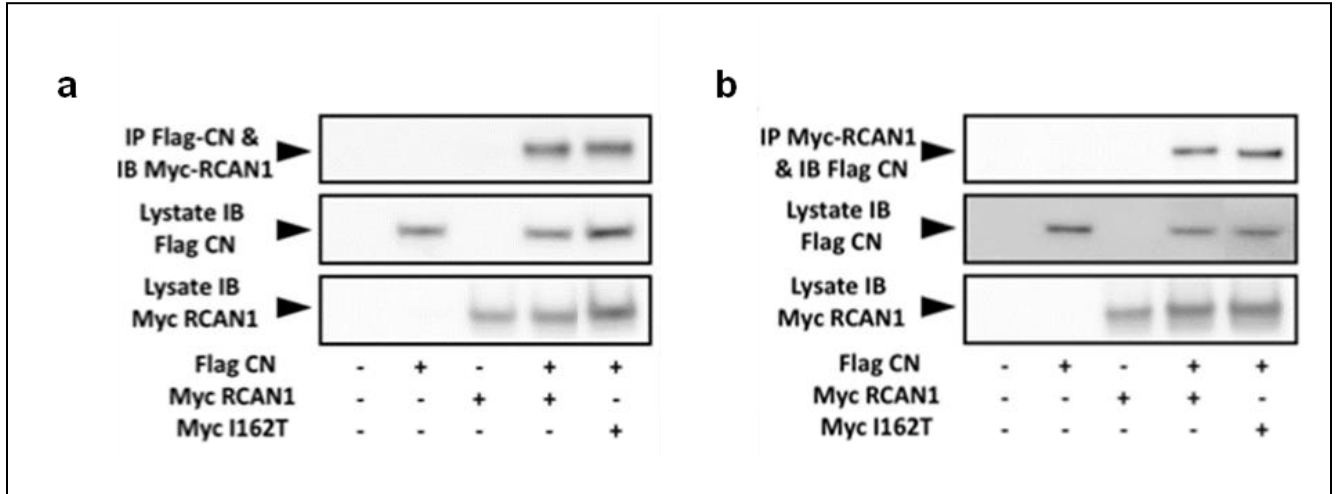

**Supplementary Figure 5: *RCAN1* single transfection calcineurin activity.**

To ensure that the calcineurin activity and NFAT luciferase activity assays were working appropriately, we examined the activity of unmodified HEK293 cells as well as the single transfections of *RCAN1* WT or *PPP3CA*. (a&b) Both the calcineurin activity (a) and NFAT expression (b) decreased in *RCAN1* WT expressing cells and increased in *PPP3CA* expressing cells compared to unmodified cells, demonstrating the efficacy of the assays.

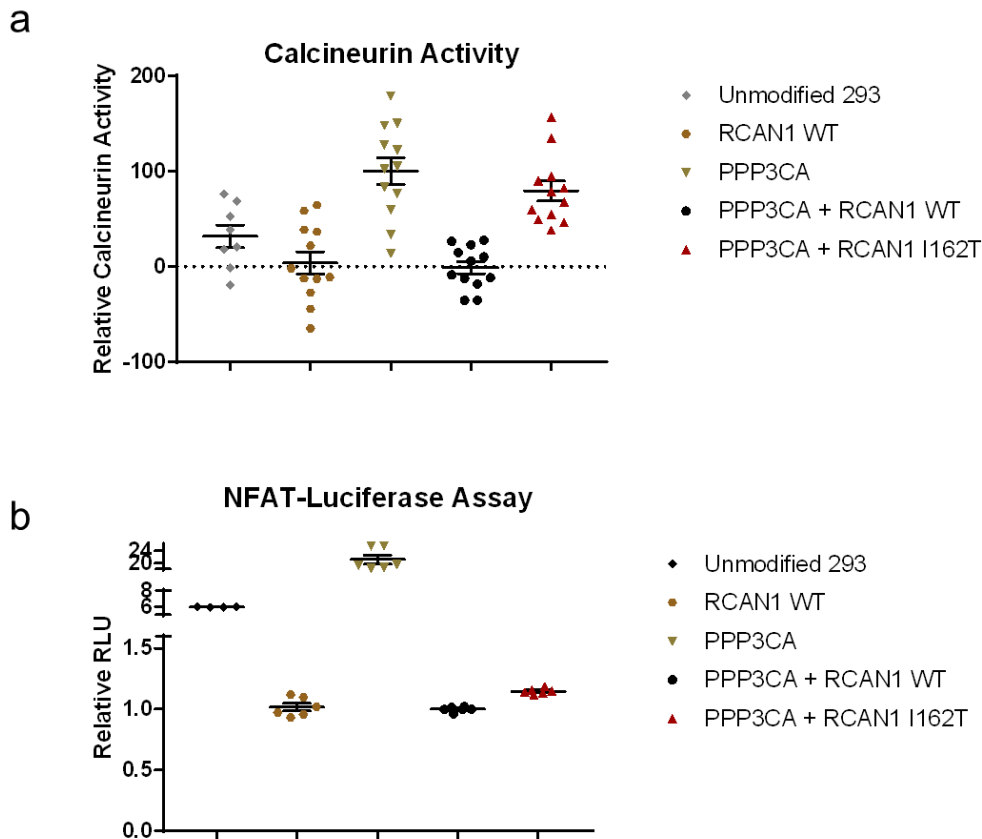

### Supplementary Figure 6: Late Apoptosis/Necrosis

In addition to apoptosis readings using cleaved caspase 3 reporters, live cell automated imaging of propidium iodide staining was simultaneously used to measure late apoptosis/necrosis levels in HEK293 cells transfected with *PPP3CA* and either WT *RCAN1* (black circle) or I162T (red triangle) mutants. The I162T expressing cells displayed increased late apoptotic/necrotic cells compared to WT *RCAN1* expressing cells ( $p=0.0152$  at 24 hours respectively, two-way ANOVA). This increased cell death was eliminated when the cells were treated with 1 $\mu$ M of FK506 (blue triangle) ( $p>0.4$  for all time points in both mutants).

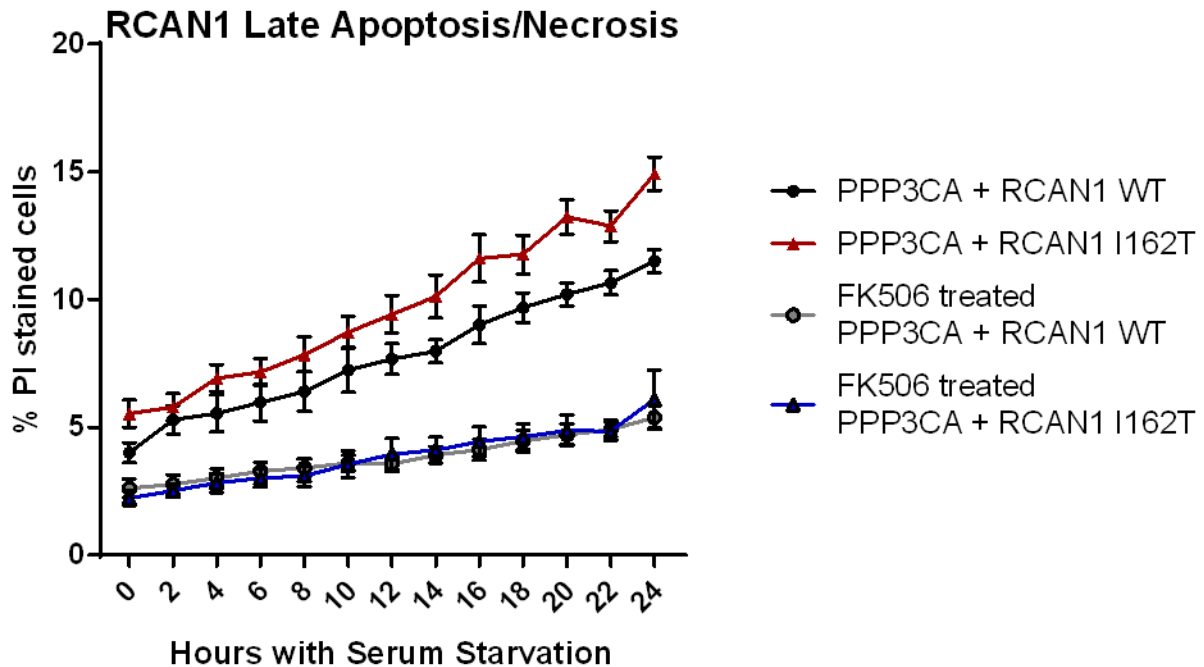



**Supplementary Figure 7:** Unmodified western blots for RCAN1 (a),  $\beta$ -actin (b), Caspase 3 (c), and  $\beta$ -actin (d) in conditionally immortalized podocytes. Unmodified western blots for Caspase-3 (e), Myc-tag (f), and  $\beta$ -actin (g) in 293 cells.

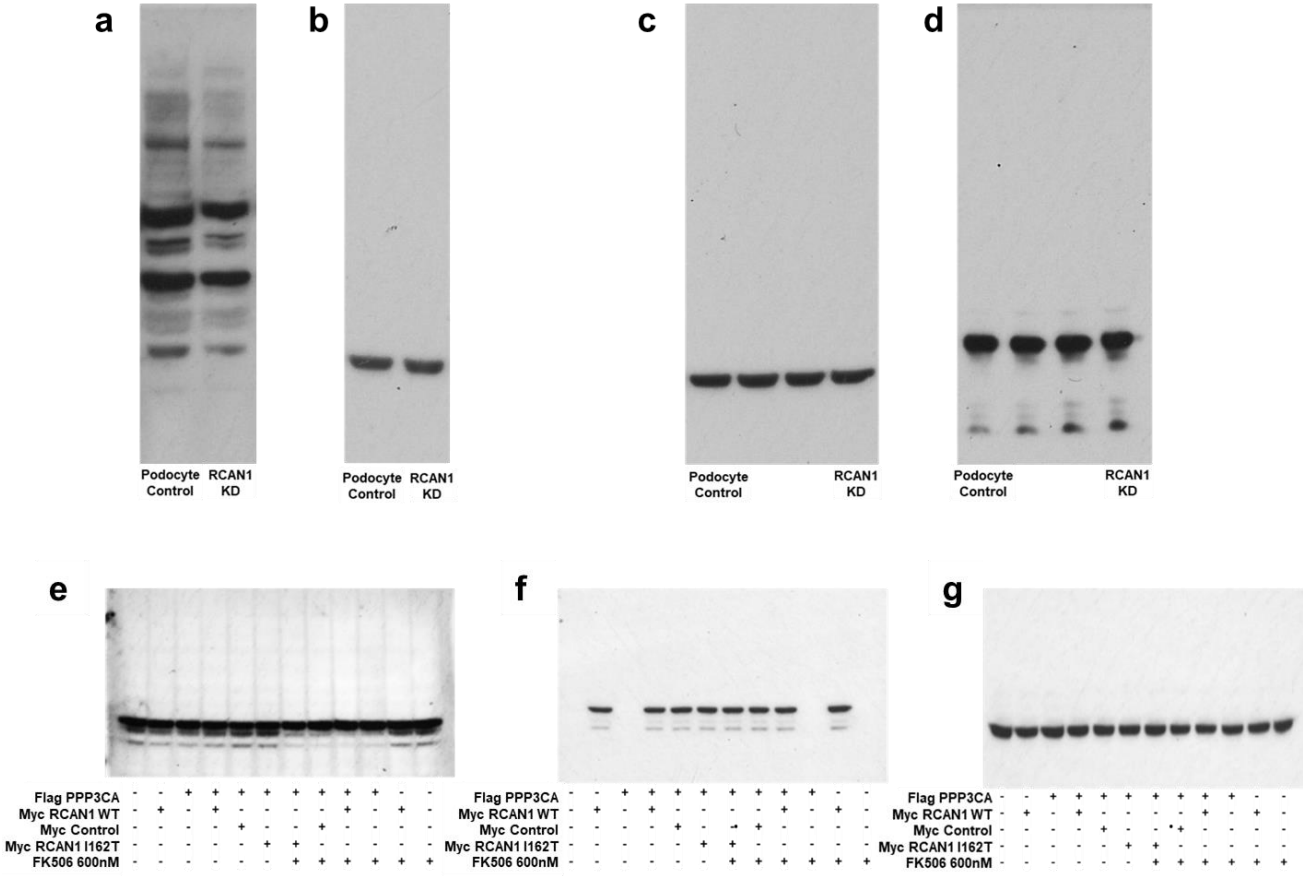

**Supplementary Table 1: Segregating variants found in Family 40030**

| Gene         | HGVSc     | HGVSp   | gnomAD (Eur) | MAF     | CADD | Polyphen          | SIFT     | Mut Taster      |
|--------------|-----------|---------|--------------|---------|------|-------------------|----------|-----------------|
| <i>RCAN1</i> | c.485T>C  | p.I162T | 2/128738     | 0.00001 | 26.7 | Probably Damaging | Damaging | Disease causing |
| <i>MAST3</i> | c.1160G>A | p.R387H | 49/122646    | 0.0003  | 26.0 | Possibly Damaging | Damaging | Disease causing |
| <i>POLD1</i> | c.653G>A  | p.R218H | 41/124252    | 0.0003  | 32.0 | Possibly Damaging | Damaging | Disease causing |
| <i>CBR3</i>  | c.605 C>A | p.T202K | 28/129144    | 0.0002  | 34.0 | Probably Damaging | Damaging | Disease causing |

GRCH37: RCAN1-001: ENST0000031380

**Supplementary Table 2:** Evolutionary conservation of *RCAN1* variant residues

|          | I162 |   |   |  | K128 |   |   |
|----------|------|---|---|--|------|---|---|
| Human    | S    | I | L |  | H    | K | T |
| Rhesus   | S    | I | L |  | H    | K | T |
| Mouse    | S    | I | L |  | H    | K | T |
| Dog      | S    | I | L |  | H    | K | T |
| Elephant | S    | I | L |  | H    | K | T |
| Chicken  | S    | I | L |  | H    | K | T |

**Supplementary Table 3: Description of cohorts**

| <b>Cohort</b>                                | <b>Individuals/<br/>Family</b> | <b>Race*<br/>White/Black/<br/>Asian/Others</b> | <b>Histology*<br/>FSGS/MCD/<br/>Others /Unknown</b> | <b>Therapy* response<br/>SRNS/SSNS/<br/>Unknown</b> |
|----------------------------------------------|--------------------------------|------------------------------------------------|-----------------------------------------------------|-----------------------------------------------------|
| <b>Duke</b>                                  | 547/392                        | 182/66/119/25                                  | 118/55/29/190                                       | 110/195/87                                          |
| <b>Boston Children's<br/>Hospital</b>        | 138/114                        | 114/0/0/0                                      | 7/0/107/0                                           | 7/0/107                                             |
| <b>NEPTUNE cohort</b>                        | 627/627                        | 332/149/67/79                                  | 183/168/129/147                                     | NA++                                                |
| <b>Beth Israel Hospital,<br/>Boston</b>      | 524/337                        | 216/31/21/69                                   | 337/0/0                                             | 337/0/0                                             |
| <b>Toronto General<br/>Hospital , Canada</b> | 193/193                        | NA                                             | NA                                                  | 42/45/106                                           |
| <b>UK NephroS cohort</b>                     | NA                             | NA                                             | NA                                                  | NA                                                  |

\* Findings in proband

NA: Not available

++: Partial or complete remission ever (Yes/No/Unknown) 451/98/78

**Supplementary Table 4:** Heterozygous missense variants in *RCAN1-3* genes in patients with nephrotic syndrome

| <i>Gene</i>  | rsID         | Exon | Nucleotide | Protein |
|--------------|--------------|------|------------|---------|
| <i>RCAN1</i> |              | 1    | c.A107C    | p.L36R  |
| <i>RCAN1</i> |              | 1    | c.A109C    | p.S37A  |
| <i>RCAN1</i> | rs749675544  | 1    | c.C115T    | p. A39T |
| <i>RCAN1</i> | rs377673728  | 2    | c.C368T    | p.R123K |
| <i>RCAN1</i> | rs140515920  | 2    | c.A382G    | p.K128E |
| <i>RCAN1</i> | rs146806035  | 3    | c.C448T    | p.H150Y |
| <i>RCAN1</i> | rs145120179  | 3    | c.C458T    | p.P153L |
| <i>RCAN1</i> | rs1178734954 | 3    | c.T485C    | p.I162T |
| <i>RCAN2</i> |              | 4    | c.C445A    | p.P149T |
| <i>RCAN2</i> |              | 5    | c.G596C    | p.G199A |
| <i>RCAN2</i> | rs201948840  | 5    | c.C700T    | p.R234H |
| <i>RCAN2</i> | rs138769310  | 5    | c.G721T    | p.V241L |
| <i>RCAN2</i> |              | 5    | c.A728C    | p.N243H |
| <i>RCAN3</i> | rs114568126  | 4    | c.C391T    | p.R131W |
| <i>RCAN3</i> |              | 4    | c.A482T    | p.E161V |
| <i>RCAN3</i> |              | 4    | c.T517G    | p.C173G |
| <i>RCAN3</i> | rs779074675  | 5    | c.G566C    | p.G189A |
| <i>RCAN3</i> |              | 5    | c.A605C    | p.E202A |
| <i>RCAN3</i> | rs201998230  | 5    | c.G668T    | p.R223L |
| <i>RCAN3</i> | rs201388228  | 5    | c.G673A    | p.D225N |

GRCH37:

*RCAN1*-001: ENST00000313806.4,

*RCAN2*-002: ENST00000371374.1,

*RCAN3*-001: ENST00000374395.4

## Supplementary Table 5: Members of the Nephrotic Syndrome Study Network (NEPTUNE)

### NEPTUNE Enrolling Centers

*Cleveland Clinic, Cleveland, OH:* K Dell\*, J Sedor\*\*, M Schachere#, J Negrey#  
*Children's Hospital, Los Angeles, CA:* K Lemley\*, E Lim#  
*Children's Mercy Hospital, Kansas City, MO:* T Srivastava\*, A Garrett#  
*Cohen Children's Hospital, New Hyde Park, NY:* C Sethna\*, K Laurent #  
*Columbia University, New York, NY:* G Appel\*, A Pradhan#  
*Emory University, Atlanta, GA:* L Greenbaum\*, C Wang\*\*, C Kang#  
*Harbor-University of California Los Angeles Medical Center:* S Adler\*, J LaPage#  
*John H. Stroger Jr. Hospital of Cook County, Chicago, IL:* A Athavale\*, M Itteera  
*Johns Hopkins Medicine, Baltimore, MD:* M Atkinson\*, S Boynton#  
*Mayo Clinic, Rochester, MN:* F Fervenza\*, M Hogan\*\*, J Lieske\*, V Chernitskiy#  
*Montefiore Medical Center, Bronx, NY:* F Kaskel\*, M Ross\*, P Flynn#  
*NIDDK Intramural, Bethesda MD:* J Kopp\*, J Blake#  
*New York University Medical Center, New York, NY:* H Trachtman\*, O Zhdanova\*\*, F Modersitzki#, S Vento#  
*Stanford University, Stanford, CA:* R Lafayette\*, K Mehta#  
*Temple University, Philadelphia, PA:* C Gadegbeku\*, S Quinn-Boyle#  
*University Health Network Toronto:* M Hladunewich\*\*, H Reich\*\*, P Ling#, M Romano#  
*University of Miami, Miami, FL:* A Fornoni\*, C Bidot#  
*University of Michigan, Ann Arbor, MI:* M Kretzler\*, D Gipson\*, A Williams#, J LaVigne#  
*University of North Carolina, Chapel Hill, NC:* V Derebail\*, K Gibson\*, E Cole#, J Ormond-Foster#  
*University of Pennsylvania, Philadelphia, PA:* L Holzman\*, K Meyers\*\*, K Kallem#, A Swenson#  
*University of Texas Southwestern, Dallas, TX:* K Sambandam\*, Z Wang#, M Rogers#  
*University of Washington, Seattle, WA:* A Jefferson\*, S Hingorani\*\*, K Tuttle\*\*§, M Bray #, M Kelton#, A Cooper#§  
*Wake Forest University Baptist Health, Winston-Salem, NC:* JJ Lin\*, Stefanie Baker#

*Data Analysis and Coordinating Center:* M Kretzler, L Barisoni, J Bixler, H Desmond, S Eddy, C Gadegbeku, B Gillespie, D Gipson, L Holzman, V Kurtz, M Larkina, J Lavigne, S Li, CC Lienczewski, J Liu, T Mainieri, L Mariani, M Sampson, M Wladkowski, A Williams, J Zee

*Digital Pathology Committee:* Carmen Avila-Casado (UHN-Toronto), Serena Bagnasco (Johns Hopkins), Joseph Gaut (Washington U), Stephen Hewitt (National Cancer Institute), Jeff Hodgkin (University of Michigan), Kevin Lemley (Children's Hospital LA), Laura Mariani (University of Michigan), Matthew Palmer (U Pennsylvania), Avi Rosenberg (NIDDK), Virginie Royal (Montreal), David Thomas (University of Miami), Jarcy Zee (Arbor Research) Co-Chairs: Laura Barisoni (Duke University) and Cynthia Nast (Cedar Sinai)

\*Principal Investigator; \*\*Co-investigator; #Study Coordinator

§Providence Medical Research Center, Spokane, WA

**Supplementary Protein Modeling (Movies 1-2):** Movie files showing the predicted 3D structures of wildtype *RCAN1* (Supplementary Movie 1), and *RCAN1* I162T (Supplementary Movie 2).

**Supplementary Apoptosis (Movies 2-5):** Movie files of HEK 293 cells transfected with *PPP3CA* and either *RCAN1* WT (Supplementary Movie 3), and *RCAN1* I162T (Supplementary Movie 4) undergoing serum starvation (4hr-24hr of starvation). Cell death can be observed and quantified with green fluorescence indicating cleaved caspase 3 activity (apoptosis) which is then followed by red propidium iodide staining (late apoptosis/necrosis). Reduced apoptosis can be observed in *RCAN1* I162T (Supplementary Movie 5) cells treated with 1 $\mu$ M FK506.
